# Supplementary material for: Rapid expansion and international spread of M1UK in the post-pandemic UK upsurge of Streptococcus pyogenes
Source: PubMed Central journal article supplement (PMC11087535; doi:10.1038/s41467-024-47929-7), 2024-05-10
Supplement: 41467_2024_47929_MOESM1_ESM.pdf [file 41467_2024_47929_MOESM1_ESM.pdf]

## Supplementary information Figures and Tables for

### Rapid expansion and international spread of M1<sub>UK</sub> in the post-pandemic UK upsurge of *Streptococcus pyogenes*

|                       |                                                                                                                             |
|-----------------------|-----------------------------------------------------------------------------------------------------------------------------|
| Supplementary Table 1 | Signature SNPs of the three emergent clades during iGAS upsurge in England                                                  |
| Supplementary Table 2 | SNP variation observed within different M1 <sub>UK</sub> and M1 <sub>global</sub> groups.                                   |
| Supplementary Table 3 | Clinical source of invasive <i>emm1</i> strains used in this study (2013 to 2023)                                           |
| Supplementary Table 4 | <i>Emm1</i> isolates from lower respiratory tract and pleural samples: association with <i>emm1</i> sub lineages over time. |
| Supplementary Table 5 | Differences in phage content in 1815 <i>emm1</i> invasive strains                                                           |

|                        |                                                                                                                                         |
|------------------------|-----------------------------------------------------------------------------------------------------------------------------------------|
| Supplementary Figure 1 | Phylogenetic tree showing <i>emm1</i> isolates from iGAS in children (< 15 years) intermixed with iGAS in adults (2013 to 2023).        |
| Supplementary Figure 2 | Differences between lineages in SNP distribution across 1815 <i>emm1</i> genomes mapped against MGAS5005                                |
| Supplementary Figure 3 | Frequency of change in caseinolytic activity after <i>in vivo</i> passage of panel of M1 <sub>global</sub> and M1 <sub>UK</sub> strains |
| Supplementary Figure 4 | Non-synonymous mutations in regulatory genes of <i>emm1</i> strains: distribution within the phylogenetic tree                          |
| Supplementary Figure 5 | Estimated effective population size (Ne) of M1 <sub>UK</sub> in the UK through time.                                                    |

**Supplementary Table 1 – Signature SNPs of three emergent M1<sub>UK</sub> clades identified during iGAS upsurge**

|                                                     | Location             | Locus             | Gene                     | Product                               | Genetic change<br>Synonymous (S)<br>Non-synonymous<br>(NS) | Protein<br>change | Allele in M1 <sub>UK</sub><br>Clade of<br>interest | Allele in<br>remaining<br>M1 <sub>UK</sub> | Allele in<br>M1 <sub>global</sub> |
|-----------------------------------------------------|----------------------|-------------------|--------------------------|---------------------------------------|------------------------------------------------------------|-------------------|----------------------------------------------------|--------------------------------------------|-----------------------------------|
| <b>M1<sub>UK</sub><br/>Clade 1</b><br>(123 strains) | 359672               | M5005_Spy0353*    | x                        | putative membrane spanning protein    | STOP 28C>T                                                 | Gln10*            | T                                                  | C                                          | C                                 |
|                                                     | 365403               | M5005_Spy0360     | x                        | NAD-dependent oxidoreductase          | S 444C>T                                                   | Asp148Asp         | T                                                  | C                                          | C                                 |
| <b>M1<sub>UK</sub><br/>Clade 2</b><br>(166 strains) | 1514811 <sup>ψ</sup> | Intergenic region |                          |                                       | Intergenic                                                 | Intergenic        | T                                                  | C                                          | C                                 |
|                                                     | 1681178 <sup>β</sup> | M5005_Spy1718     | <i>sic1.01</i>           | streptococcal inhibitor of complement | NS 770A>T                                                  | Gln257Leu         | A                                                  | T                                          | T                                 |
|                                                     | 711809               | M5005_Spy0709     | <i>pyrC</i>              | dihydroorotase                        | NS.509A>C                                                  | Asn170Thr         | C                                                  | A                                          | A                                 |
|                                                     | 727058               | M5005_Spy0723     | <i>hflX</i>              | GTP-binding protein                   | S.813C>T                                                   | Thr271Thr         | T                                                  | C                                          | C                                 |
|                                                     | 47867                | M5005_Spy0029     | <i>purD</i>              | phosphoribosylamine—glycine ligase    | S 840C>T                                                   | Ile280Ile         | T                                                  | C                                          | C                                 |
|                                                     | 1122436              | M5005_Spy1146     |                          | DNA polymerase III, delta subunit     | NS.643G>A                                                  | Asp215Asn         | T                                                  | C                                          | C                                 |
| <b>M1<sub>UK</sub><br/>Clade 3</b><br>(285 strains) | 899440               | M5005_Spy0913     | <i>xerD</i> <sup>Ω</sup> | recombinase                           | NS791C>T                                                   | Ala264Val         | A                                                  | G                                          | G                                 |
|                                                     | 1732547              | M5005_Spy1771     | <i>hutU</i>              | urocanate hydratase                   | NS .98G>T                                                  | Arg33Ile          | T                                                  | G                                          | G                                 |
|                                                     | 1493521              | M5005_Spy1534     | <i>secA</i>              | protein translocase subunit           | NS.1331A>G                                                 | Asp444Gly         | C                                                  | T                                          | T                                 |

SNP annotation made using snippy and MGAS5005 (CP000017.2) as a reference.

<sup>†</sup>MGAS5005 (NC\_007297) has a different annotation in this location: Intergenic region upstream of M5005\_Spy0353;

<sup>‡</sup>One strain in remaining M1<sub>UK</sub> group had missing data;

<sup>§</sup>One strain in remaining M1<sub>UK</sub> group and one strain in the M1<sub>global</sub> group had a large deletion in *sic*.

<sup>Ω</sup>MGAS5005 (NC\_007297) has a different annotation in this location, *xerS*.

<sup>x</sup>no assigned gene name

**Supplementary Table 2 - SNP variation observed within different M1<sub>UK</sub> and M1<sub>global</sub> groups.**

|                            | <b>Groups</b>                  | <b>No. of isolates analysed</b> | <b>No. of SNPs (mean)</b> | <b>No. of SNPs (median)</b> | <b>Interquartile range</b> | <b>Max no. of SNPs</b> | <b>Min no. of SNPs</b> |
|----------------------------|--------------------------------|---------------------------------|---------------------------|-----------------------------|----------------------------|------------------------|------------------------|
| <b>M1<sub>global</sub></b> | M1 <sub>global</sub> 2013-2021 | 143                             | 32                        | 34                          | 19.8-50.0                  | 79                     | 0                      |
|                            | M1 <sub>global</sub> 2022-2023 | 46                              | 45                        | 55                          | 38.0-51.7                  | 73                     | 0                      |
|                            | All M1 <sub>global</sub>       | 189                             | 45                        | 34                          | 22.0-50.5                  | 73                     | 0                      |
| <b>M1<sub>UK</sub></b>     | M1 <sub>UK</sub> 2013-2021     | 551                             | 15                        | 16                          | 5.9-24.0                   | 39                     | 0                      |
|                            | M1 <sub>UK</sub> 2022-2023     | 1001                            | 22                        | 22                          | 17.9-25.4                  | 50                     | 0                      |
|                            | All M1 <sub>UK</sub>           | 1552                            | 17                        | 17                          | 18.2-24.4                  | 50                     | 0                      |
|                            | M1 <sub>UK</sub> Clade1        | 123                             | 2                         | 2                           | 1.2-3.0                    | 10                     | 0                      |
|                            | M1 <sub>UK</sub> Clade2        | 166                             | 3                         | 3                           | 2.3-3.7                    | 13                     | 0                      |
|                            | M1 <sub>UK</sub> Clade3        | 285                             | 4                         | 3                           | 2.9-4.8                    | 11                     | 0                      |

**Supplementary Table 3 – Clinical source of invasive disease *emm1* strains used in this study (2013 to 2023)**

|                                            | Overall 2013-2023 |                      |                    | 2013-2021        |                      |                    | 2022-2023        |                      |                    |
|--------------------------------------------|-------------------|----------------------|--------------------|------------------|----------------------|--------------------|------------------|----------------------|--------------------|
| Specimens from invasive disease            | M1 <sub>UK</sub>  | M1 <sub>global</sub> | Inter <sup>†</sup> | M1 <sub>UK</sub> | M1 <sub>global</sub> | Inter <sup>†</sup> | M1 <sub>UK</sub> | M1 <sub>global</sub> | Inter <sup>†</sup> |
| Blood                                      | 1069              | 124                  | 36                 | 356              | 95                   | 16                 | 713              | 29                   | 20                 |
| Lower Respiratory Tract* (pleural samples) | 108 (78)          | 10 (5)               | 7 (6)              | 24 (11)          | 4 (2)                | 1 (1)              | 84 (67)          | 6 (3)                | 6 (5)              |
| Invasive others <sup>¶</sup>               | 194               | 29                   | 12                 | 69               | 21                   | 6                  | 125              | 8                    | 6                  |
| Swab samples <sup>‡</sup>                  | 181               | 26                   | 19                 | 102              | 23                   | 6                  | 79               | 3                    | 13                 |
| Total                                      | 1552              | 189                  | 74                 | 551              | 143                  | 29                 | 1001             | 46                   | 45                 |

<sup>†</sup>Inter category includes intermediate strains (M1<sub>13SNPs</sub>, M1<sub>23SNPs</sub>, M1<sub>22SNPs</sub>, M1<sub>19SNPs</sub>) and derivatives of M1<sub>UK</sub> (M1<sub>26SNPs</sub>)

\*Samples from lower respiratory tract include pleural. Subset of isolates from pleural samples shown in parentheses

<sup>¶</sup>Invasive others include samples from joints (n=22); central nervous system (n=10); viscera (n=13); tissue or fluid (n=137); information not provided (n=39); others (14)

<sup>‡</sup>Swab samples include skin, wound, vagina, upper respiratory tract

**Supplementary Table 4 – *emm1* isolates from lower respiratory tract samples and pleural samples: association with *emm1* sub lineages over time.**

| Lineages                                                     | Proportion of each lineage from lower respiratory tract samples |                   |                             | Proportion of each lineage from pleural samples* |                   |                             |
|--------------------------------------------------------------|-----------------------------------------------------------------|-------------------|-----------------------------|--------------------------------------------------|-------------------|-----------------------------|
|                                                              | Pre-upsurge 2013-2021                                           | Upsurge 2022/2023 | Overall 2013-2023           | Pre-upsurge 2013-2021                            | Upsurge 2022-2023 | Overall 2013-2023           |
| <b>M1<sub>global</sub></b>                                   | 2.7% (4/143)                                                    | 13.0% (6/46)      | 5.2% (10/189) <sup>‡</sup>  | 1.4% (2/143)                                     | 6.5% (3/46)       | 2.6% (5/189) <sup>§</sup>   |
| <b>M1<sub>UK</sub></b>                                       | 4.3% (24/551)                                                   | 8.3% (84/1001)    | 6.9% (108/1552)             | 2.0% (11/551)                                    | 6.7% (67/1001)    | 5.0% (78/1552)              |
| <b>M1<sub>UK</sub> separated by new clades</b>               |                                                                 |                   |                             |                                                  |                   |                             |
| <b>M1<sub>UK</sub> Clade1</b> (123 strains)                  | nil                                                             | 7.3% (9/123)      | 7.3% (9/123)                | nil                                              | 6.5% (8/123)      | 6.5% (8/123) <sup>§</sup>   |
| <b>M1<sub>UK</sub> Clade2</b> (166 strains)                  | nil                                                             | 7.8% (13/166)     | 7.8% (13/166)               | nil                                              | 6.6% (11/166)     | 6.6% (11/166) <sup>§¶</sup> |
| <b>M1<sub>UK</sub> Clade3</b> (285 strains)                  | nil                                                             | 10.2% (29/285)    | 10.2% (29/285) <sup>‡</sup> | nil                                              | 8.4% (24/285)     | 8.4% (24/285) <sup>§¶</sup> |
| <b>M1<sub>UK</sub>[excluding clades 1,2,3]</b> (978 strains) | nil                                                             | 7.7% (33/427)     | 5.8% (57/978) <sup>‡</sup>  | nil                                              | 5.6% (24/427)     | 3.5% (35/978) <sup>¶</sup>  |

\*Isolates from pleural samples are a subset of lower respiratory tract isolates, collected from pleural empyema.

<sup>§</sup>Difference between new M1<sub>UK</sub> clades and M1<sub>global</sub> empyema isolates significant (M1<sub>UK</sub> clade1 vs M1<sub>global</sub> p=0.047; M1<sub>UK</sub> clade2 vs M1<sub>global</sub> p=0.036; M1<sub>UK</sub> clade3 vs M1<sub>global</sub> p=0.005).

<sup>¶</sup>Difference between new M1<sub>UK</sub> clades and M1<sub>UK</sub>[excluding clades 1,2,3] empyema significant (M1<sub>UK</sub> clade2 vs M1<sub>UK</sub>[excluding clades 1,2,3] p=0.032; M1<sub>UK</sub> clade3 vs M1<sub>UK</sub> [excluding clades 1,2,3] p<0.001)

<sup>‡</sup>Difference between M1<sub>UK</sub>Clade3 and M1<sub>global</sub> significant (p= 0.029); difference between M1<sub>UK</sub> clade3 and M1<sub>UK</sub>[excluding clades 1,2,3] significant (p=0.005).

Statistical comparison between proportions was undertaken using a one-tailed proportion test between pairs of values using either M1<sub>global</sub> as the comparator or using M1<sub>UK</sub>[excluding clades 1,2,3] as the comparator. No adjustment for multiple comparisons was made.

Supplementary Table 5 – Differences in phage content in 1815 *emm1* invasive strains

| Phage       | Phage change                     | No. isolates affected <sup>Ω</sup> | Proportion of M <sub>1global</sub> strains | Proportion of M <sub>1UK</sub> strains | Superantigen change                | DNase change                            |
|-------------|----------------------------------|------------------------------------|--------------------------------------------|----------------------------------------|------------------------------------|-----------------------------------------|
| Φ5005.1     | Partial deletion                 | 11                                 | 2/189                                      | 9/1552                                 | <i>speA</i> absent                 | no change                               |
| Φ5005.2     | Partial deletion*                | 10                                 | 8/189                                      | 2/1552                                 | no change                          | <i>spd3</i> present                     |
| Φ5005.2     | Partial deletion*                | 55                                 | 6/189                                      | 49/1552                                | no change                          | <i>spd4</i> present/ <i>spd3</i> absent |
| Φ5005.2     | Present recombinant <sup>#</sup> | 1                                  | 0/189                                      | 1/1552                                 | no change                          | <i>spd3</i> present                     |
| Φ5005.3     | Complete absence                 | 45 <sup>Δ</sup>                    | 1/189                                      | 43/1552                                | no change                          | <i>sda2</i> absent                      |
| ΦSP1380.vir | Present                          | 4                                  | 1/189                                      | 3/1552                                 | <i>speC</i> and <i>ssa</i> present | <i>spd1</i> present                     |
| Φ370.1      | Present                          | 172 <sup>Ψ</sup>                   | 30/189                                     | 138/1552                               | <i>speC</i> present                | <i>spd1</i> present                     |

\* Different versions of partially deleted phage.

<sup>#</sup> Recombinant version of phi5005.2 phage.

<sup>Δ</sup> Includes one intermediate strain (M<sub>122SNPs</sub>) derived from M<sub>123SNPs</sub> that also lost Φ5005.3 phage.

<sup>Ψ</sup> Includes one intermediate strain (M<sub>122SNPs</sub>, derived from M<sub>123SNPs</sub>) and three M<sub>126SNPs</sub> strains with Φ370.1 phage.

<sup>Ω</sup> Denominator includes all 1815 invasive isolates, 74 of which were intermediate strains.

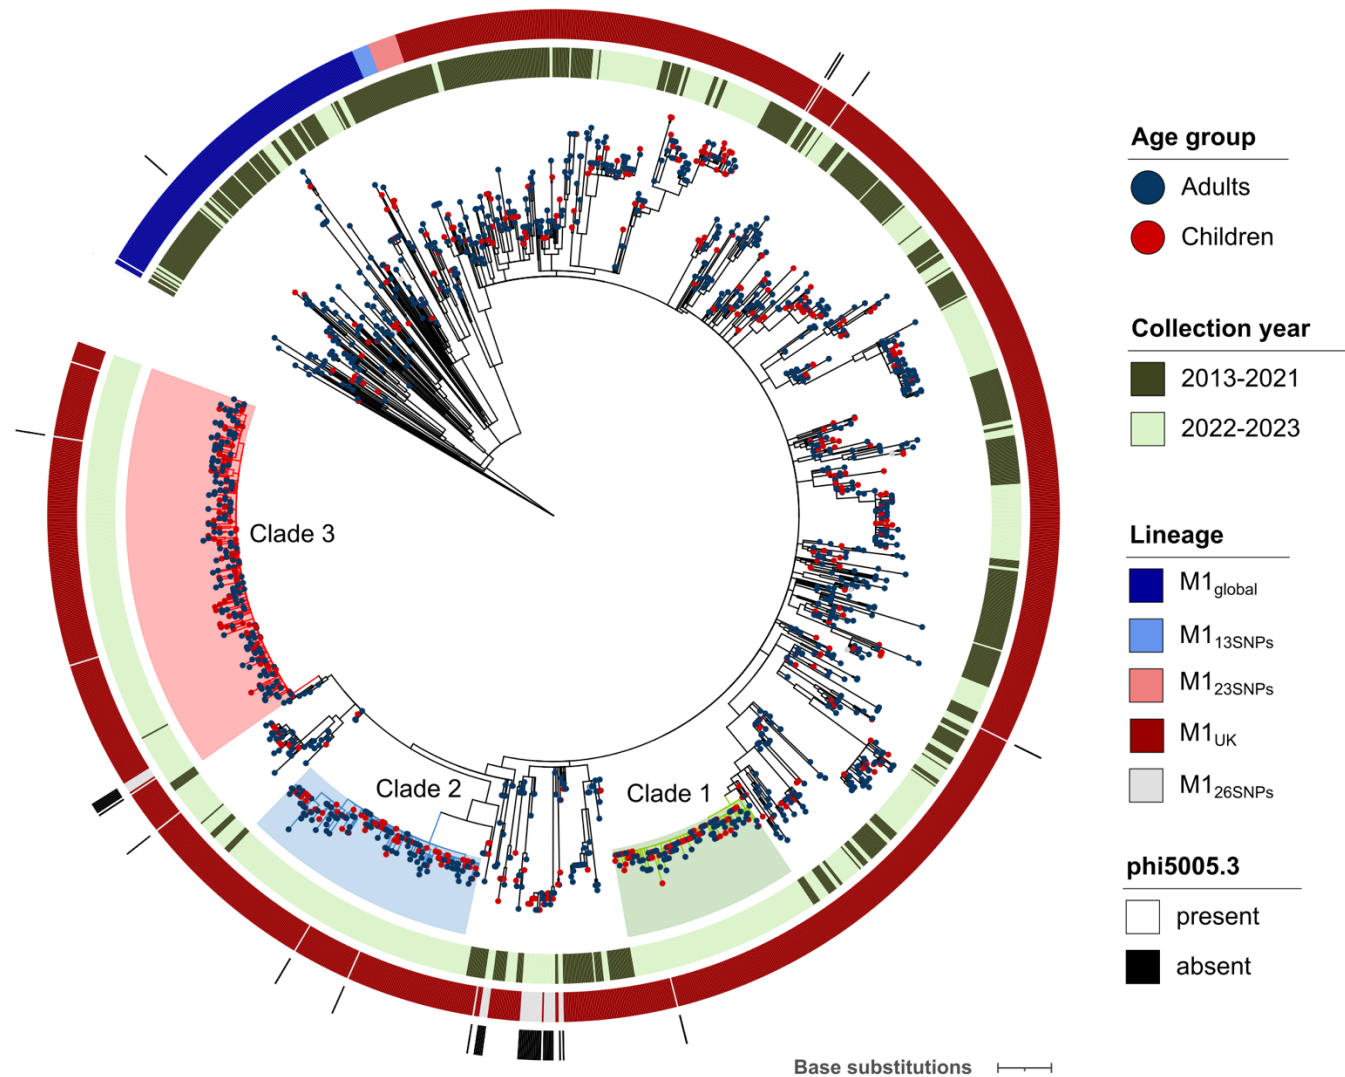

**Supplementary Figure 1 - *emm1* phylogenetic tree showing isolates from iGAS infections in children (< 15 years) intermixed with isolates from iGAS infections in adults (2013 to 2023).** Maximum likelihood phylogenetic tree constructed from 278 core SNPs (excluding recombination regions) extracted after mapping 1815 *emm1* isolated to the MGAS5005 reference genome. The tree was drawn in a circular layout and rooted on outgroup genome NCTC8198. Bars in concentric circles (from inside to outside) are coloured by collection years (pre-upsurge 2013-2021 and upsurge 2022-2023); *emm1* lineages; and presence-absence of the phi5005.3 phage. The branch tips represent age group (adult or child<15y). Source data are provided as a Source Data file Supplementary Figure 1.

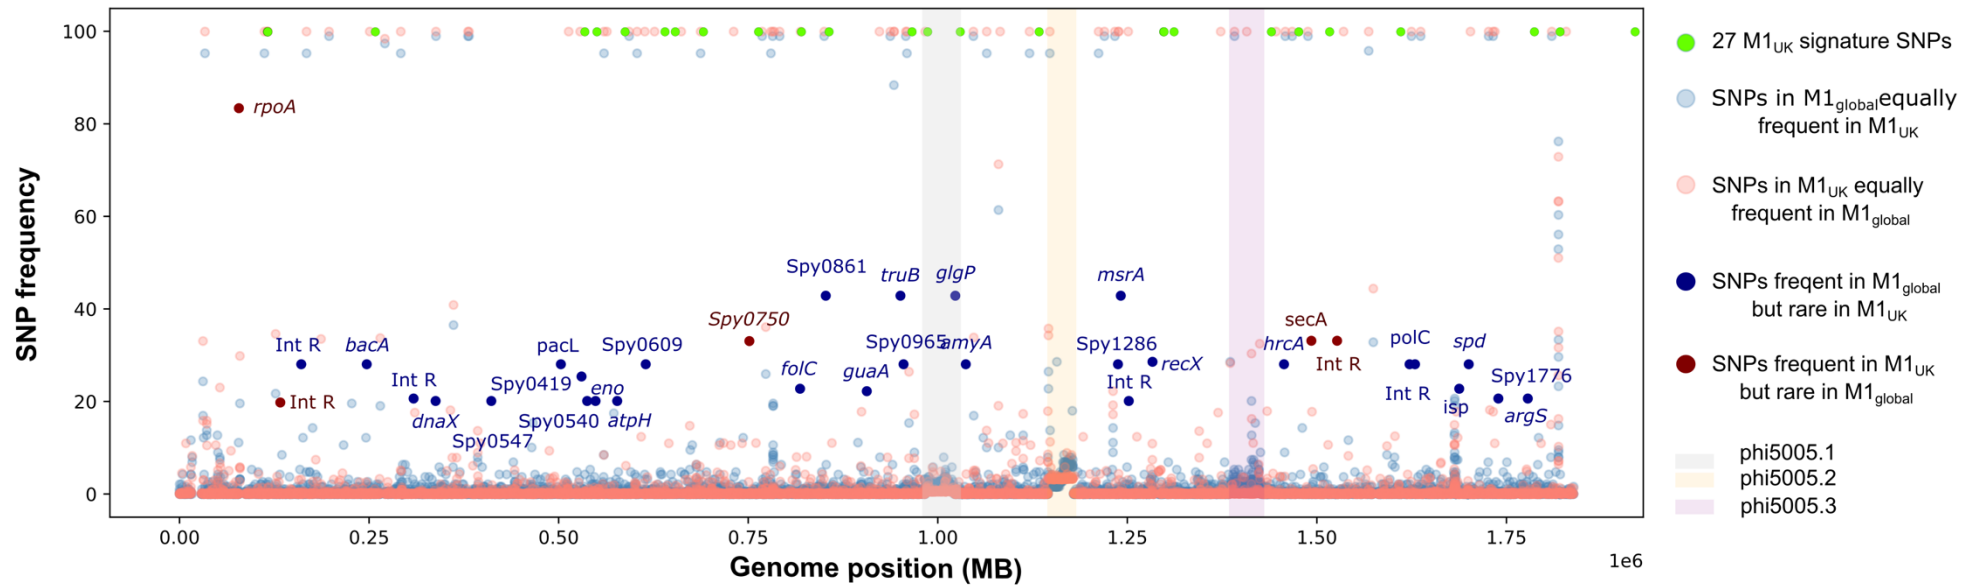

**Supplementary Figure 2 – Differences between lineages in SNP distribution across 1815 *emm1* genomes mapped against MGAS5005 (CP000017.2).** The percentage of strains with a specific SNP mutation are indicated. M1<sub>UK</sub> signature SNPs are coloured in green; SNPs present in both lineages are coloured with a pale colour; SNPs occurring with high frequency (present in >20%) in one of the lineages but rare in the other lineage (frequency < 0.5%) are indicated with darker colours. Int R- indicates Intergenic region. Data processed using python v 3.11.6. script. Resolution of individual SNPs is limited due to Figure scale hence some individual SNPs and position of individual SNPs relative to phages may overlap. Source data are provided as a Source Data file Supplementary Figure 2.



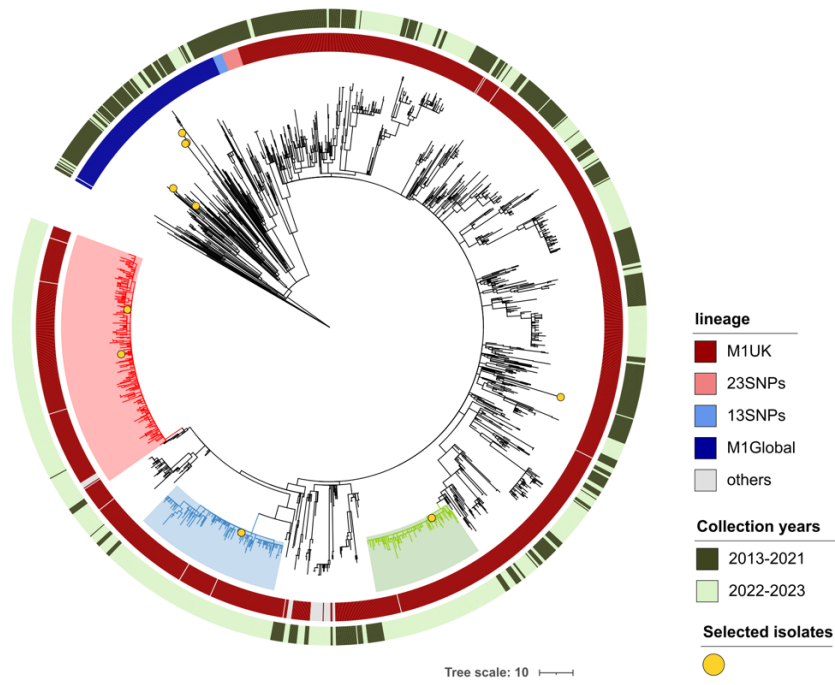

A.

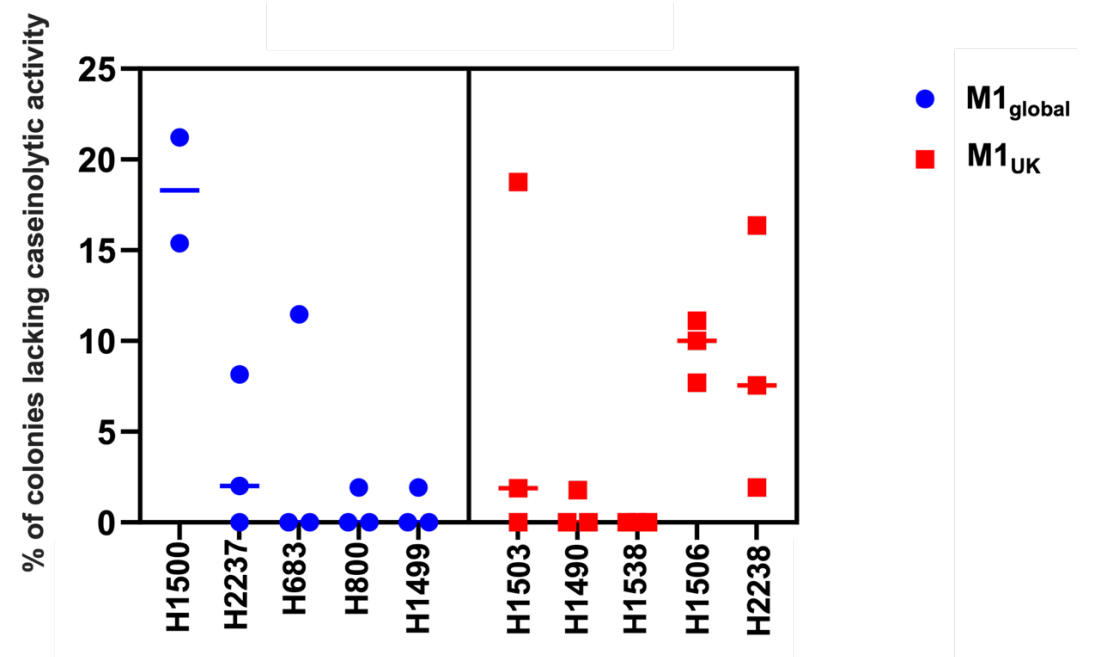

B.

**Supplementary Figure 3 Frequency of change in caseinolytic activity after *in vivo* passage of panel of M1<sub>global</sub> and M1<sub>UK</sub> strains.**

Ten *S. pyogenes emm1* strains dating from 2022, that lacked any pre-existing *covS* or *covR* mutation, were selected as representatives of each lineage (5 strains from each of M1<sub>global</sub> and M1<sub>UK</sub>) as indicated within the *emm1* phylogenetic tree (A). *S. pyogenes* strains were then used to infect mice intramuscularly, three mice per strain. 50 colonies from each spleen were tested for SpeB activity using a casein digestion assay as a surrogate marker of *covS* mutation. Graph (B) shows percentage of isolates with reduced caseinolytic (SpeB) activity. M1<sub>global</sub> and M1<sub>UK</sub> isolates were not significantly different (two-tailed nested t-test,  $p=0.98$ ). All isolates were previously sequenced and from 2022 *S. pyogenes* non-invasive *emm1* isolates. M1<sub>global</sub> strains (H1500, ERS1020045; H2237, ERS1020385; H683, ERS1020523; H800, ERS1020472; H1499, ERS1020620); M1<sub>UK</sub> (H1503, ERS1020090; H1490, ERS1020174; H1538, ERS1020508; H1506, ERS1020714; H2238, ERS1463088). Source data are provided as a Source Data file Supplementary Figure 3.

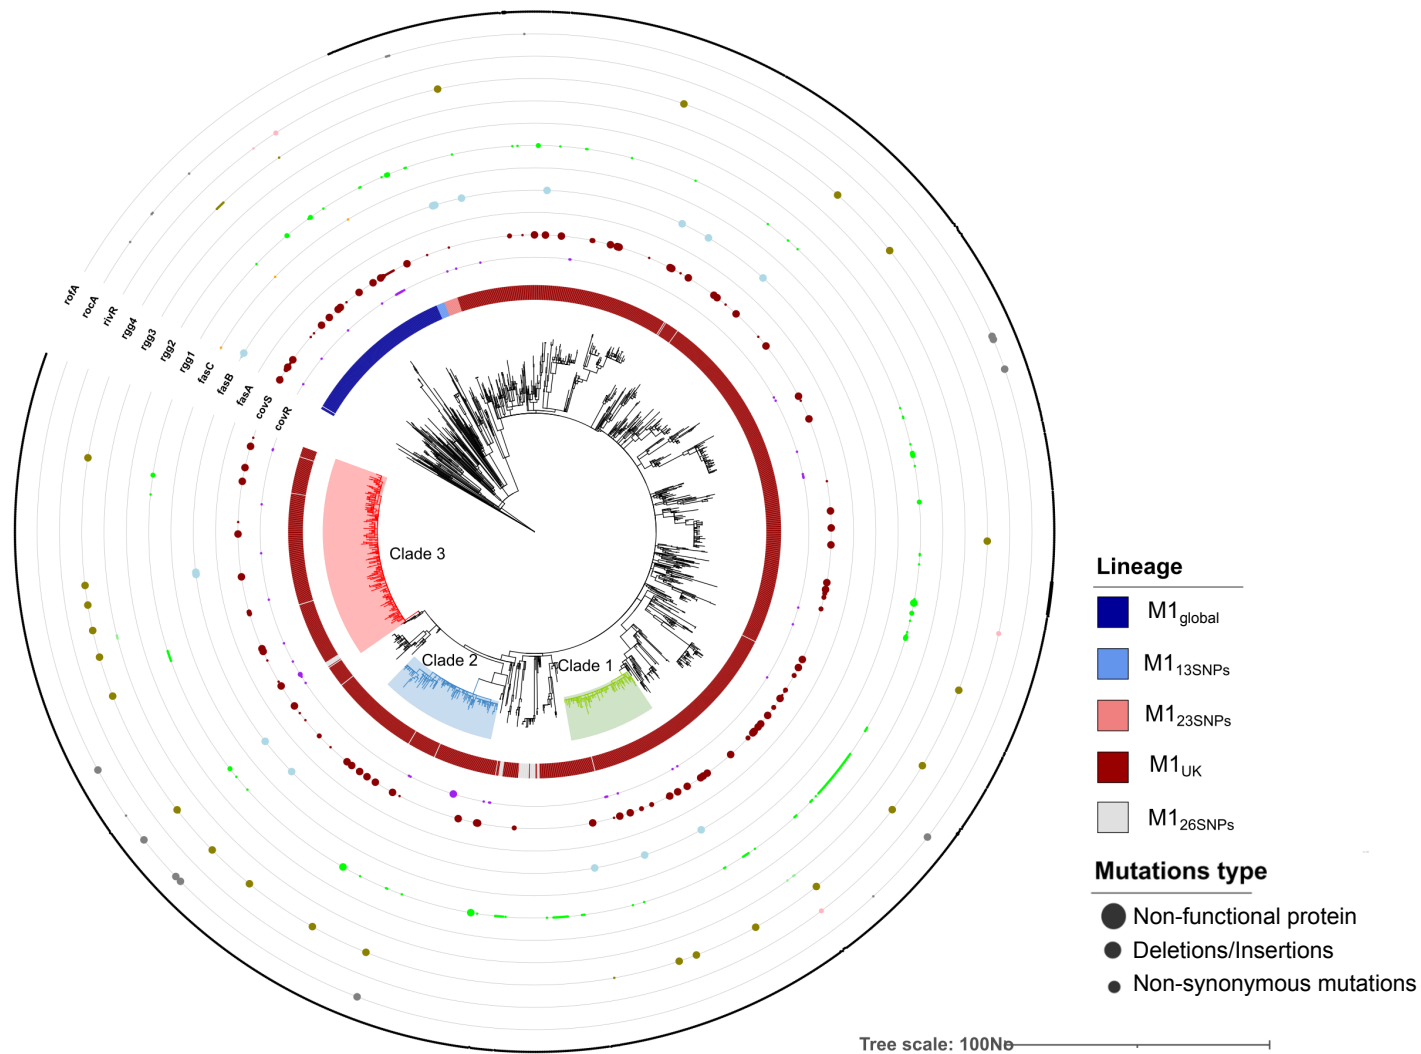

**Supplementary Figure 4 – Non-synonymous mutations in regulatory genes of *emm1* strains: distribution within the phylogenetic tree.** Main phylogenetic tree is central, showing M1<sub>global</sub>, M1<sub>UK</sub> and associated subclades. Individual regulators are indicated by outer concentric circles. Coloured bubbles indicate a mutation in an individual regulator. Large protein modifications (e.g. truncations) are highlighted with large bubbles; indels and insertions are indicated by medium sized bubbles; non-synonymous mutations are highlighted with small bubbles. All M1<sub>UK</sub> isolates have 3 missense mutations in RofA (outside ring). Source data are provided as a Source Data file Supplementary Figure 4.

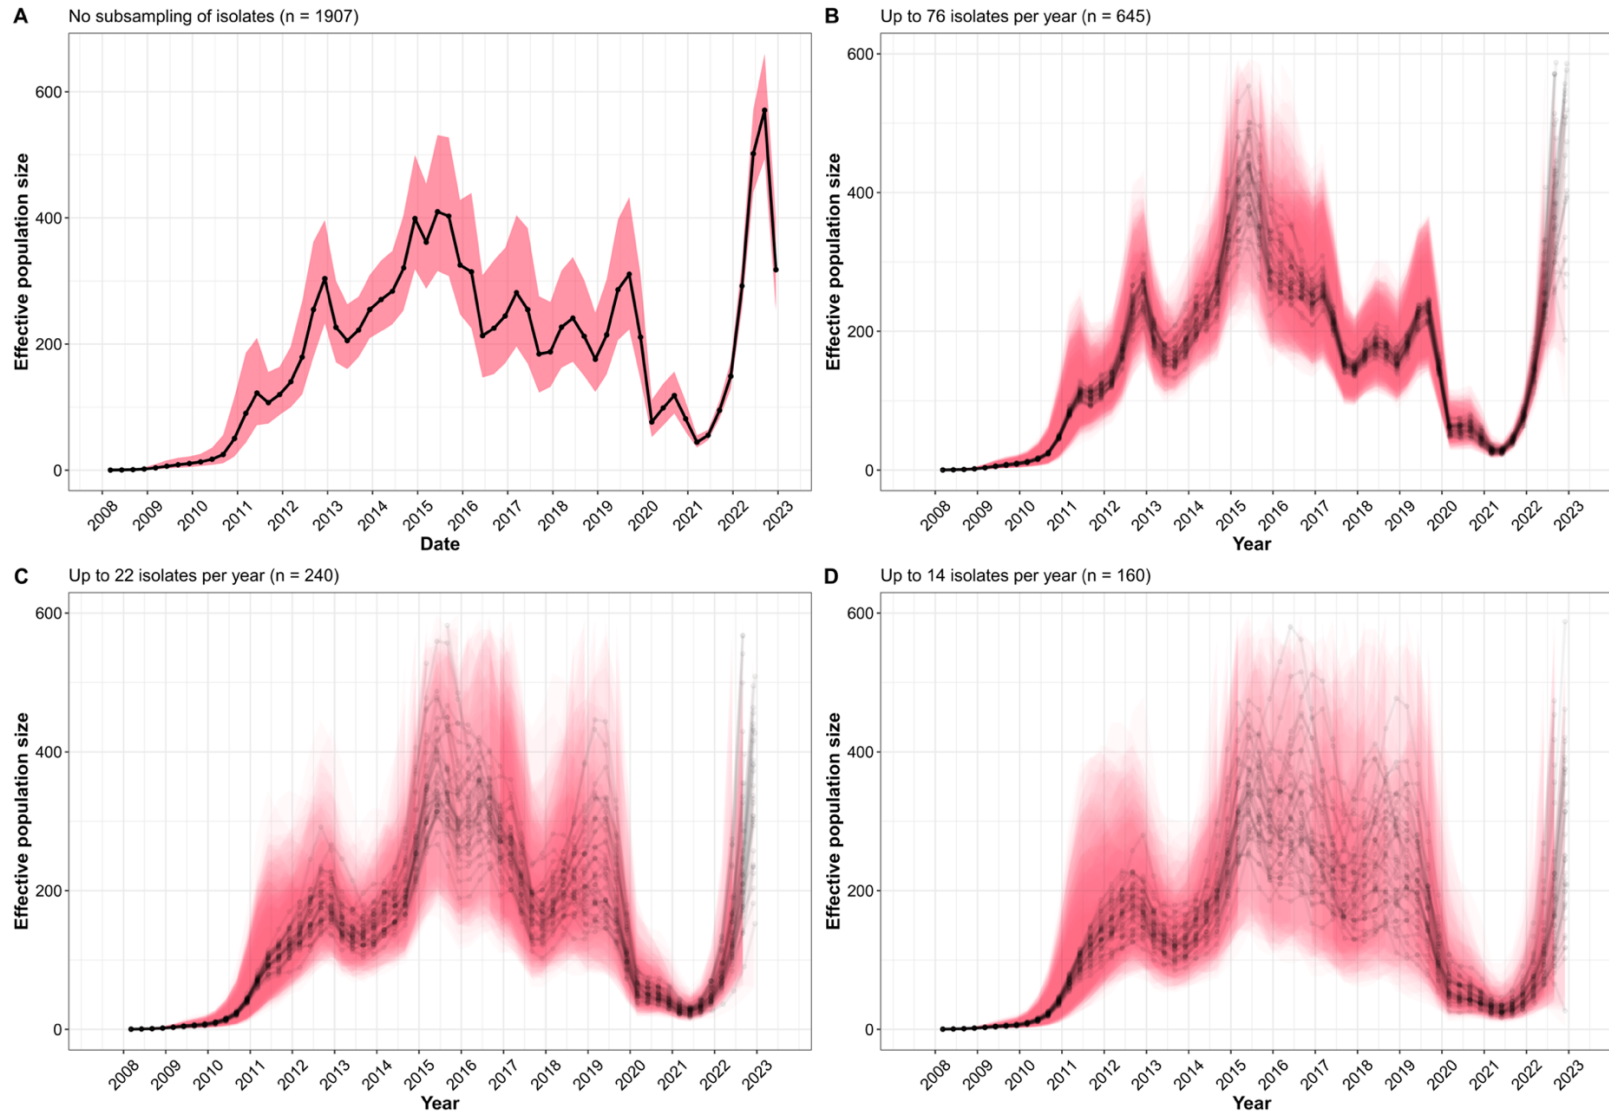

**Supplementary Figure 5. Estimated effective population size ( $N_e$ ) of M1<sub>UK</sub> in the UK through time.** Panels A-D indicate effect of altering number of isolates considered per year. A) no limit on isolates; B) up to 76 isolates per year; C) up to 22 isolates per year; D) up to 14 isolates per year. The black line and pink shading within each time interval indicate the mean and 95% confidence interval of  $N_e$ , respectively, estimated from each subtree. Source data are provided as a Source Data file Supplementary Figure 5.
