# Supplementary material for: Rapid expansion and international spread of M1UK in the post-pandemic UK upsurge of Streptococcus pyogenes
Source: PubMed Central journal article supplement (PMC11087535; doi:10.1038/s41467-024-47929-7), 2024-05-10
Supplement: 41467_2024_47929_MOESM3_ESM.pdf [file 41467_2024_47929_MOESM3_ESM.pdf]

## **Description of Additional Supplementary Files**

**Supplementary Data 1** : Distribution of indels within 1741 emm1 strains analyzed.

**Supplementary Data 2** : Frequency of antibiotic resistance genes and mutations in pbp genes in 1815 emm1 strains analyzed.

**Supplementary Data 3** : Metadata and genome accession numbers of emm1 GAS genome sequences used in this study.
